# Supplementary material for: Targeted Delivery of HSP70 to Tumor Cells via Supramolecular Complex Based on HER2-Specific DARPin9_29 and the Barnase:Barstar Pair
Source: MDPI journal article supplement (doi:10.3390/cells13040317), 2024-02-09
Supplement: s1 [file s1]

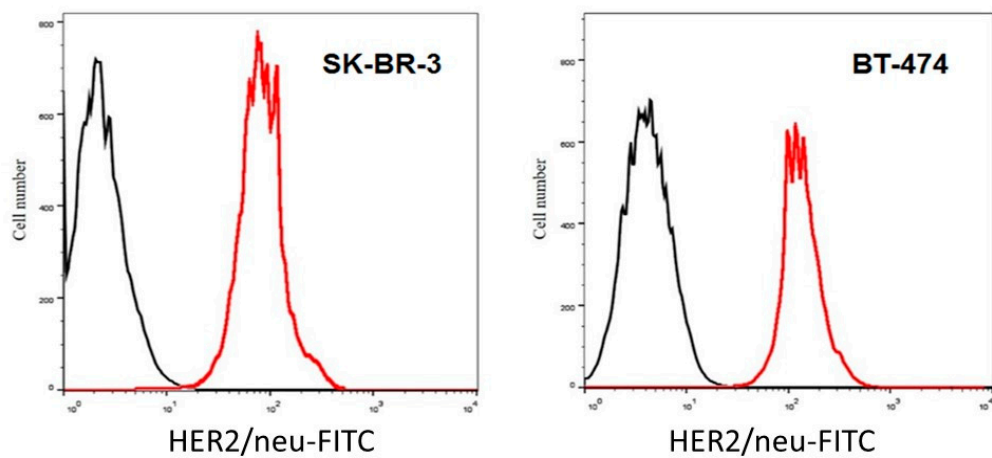

**Figure S1.** Expression of HER2/neu receptors on the membranes of tumor cell lines SK-BR-3 and BT-474. The cells were stained with DARPIn9\_29-FITC [6].

**Table S1.** Averaged fluorescence intensity of HER2/neu receptors on tumor SK-BR-3 and BT474 cell lines stained with DARPIn9\_29-FITC

| Sample  |                  | Averaged fluorescence intensity $\pm$ standard deviation |
|---------|------------------|----------------------------------------------------------|
| BT-474  | autofluorescence | 4,2 $\pm$ 7,7                                            |
|         | HER2/neu         | 131 $\pm$ 72                                             |
| SK-BR-3 | autofluorescence | 2,4 $\pm$ 3,8                                            |
|         | HER2/neu         | 67 $\pm$ 50                                              |

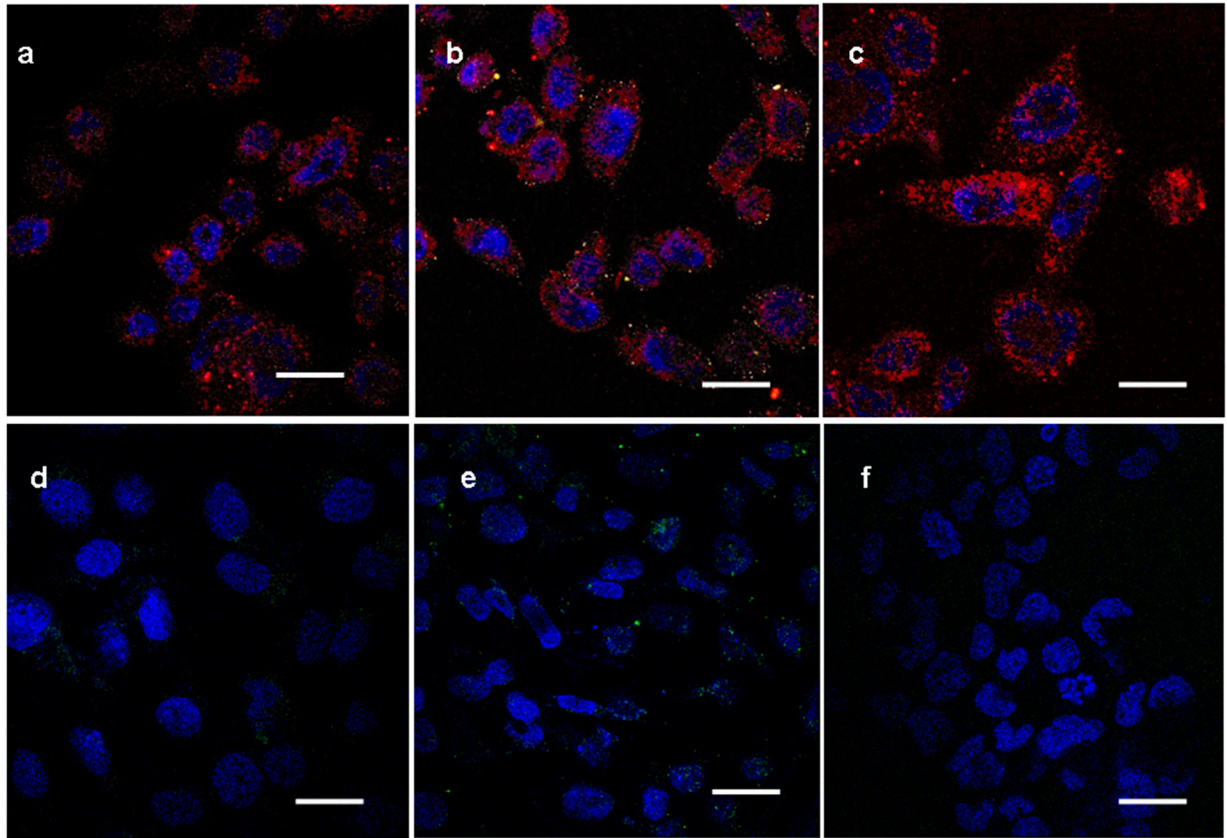

**Figure S2.** Expression of HSP70 on the surface of SK-BR-3 (a-c) and BT-474 (d-f) cells treated with barstar-HSP70 (a, d) or barstar-HSP70\_16 (b, e). The cells treated with barstar-HSP70 (a, d) or barstar-HSP70\_16 (unlabeled) were stained with the anti-HSP70 BRM22 antibody (green) and actin (a-c). Cell nuclei were stained with Hoechst 33342 (blue); control cells (c, f) were not treated with barstar-HSP70 or barstar-HSP70\_16. Scale bars, 10  $\mu$ m.

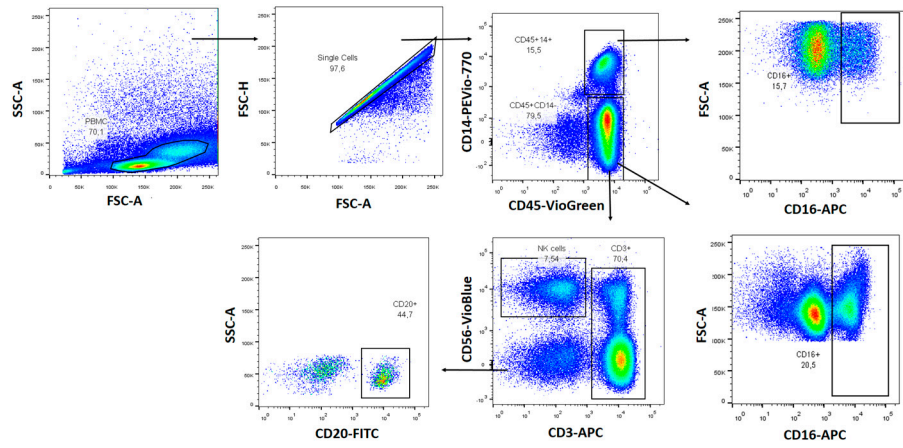

Figure S3. Representative staining of PBMC isolated from a healthy donor. Cells were labeled with CD45, CD14, CD3, CD56, CD16, and CD20 antibodies and analyzed by flow cytometry.
